# Supplementary material
Source: PubMed Central journal article supplement (PMC1464370)

A.

Divalent cations (10mM)

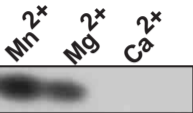

B.

Mg<sup>2+</sup>(mM)

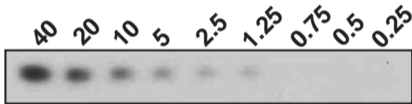

C.

Mn<sup>2+</sup>(mM)

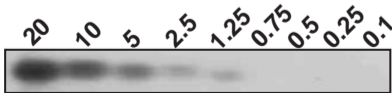

Supplement: pnas_0602379103_1.pdf [file pnas_0602379103_1.pdf]

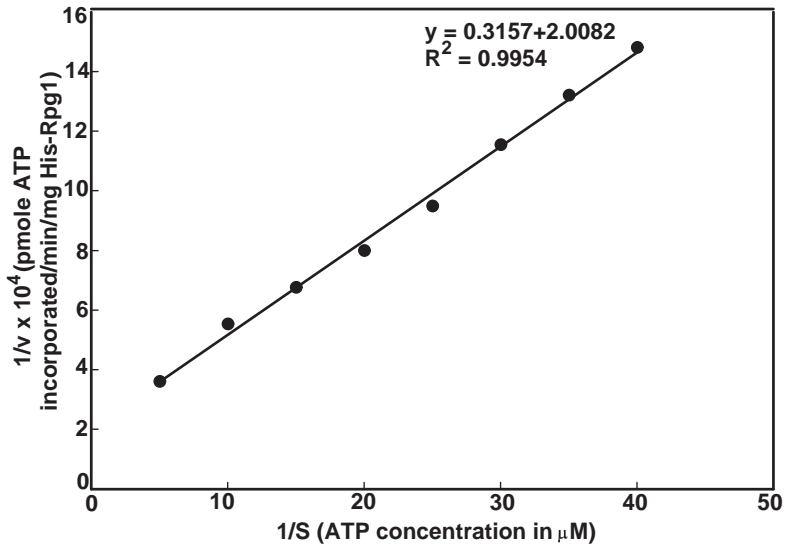

Supplement: pnas_0602379103_2.pdf [file pnas_0602379103_2.pdf]

**A.**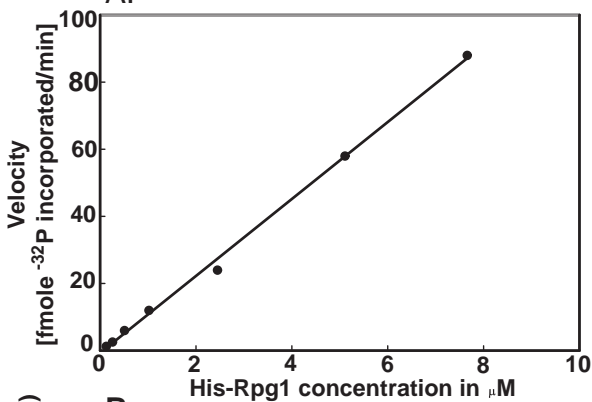**B.**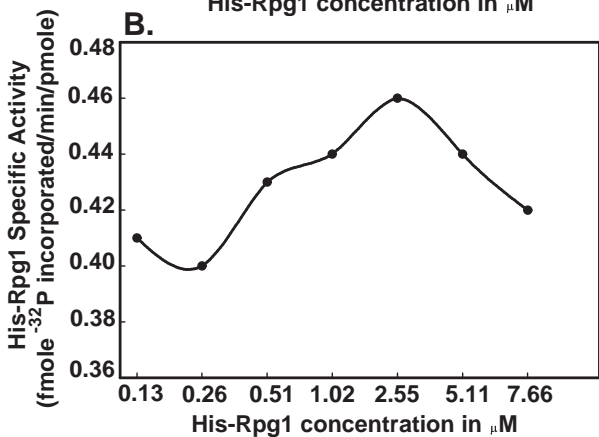**C.**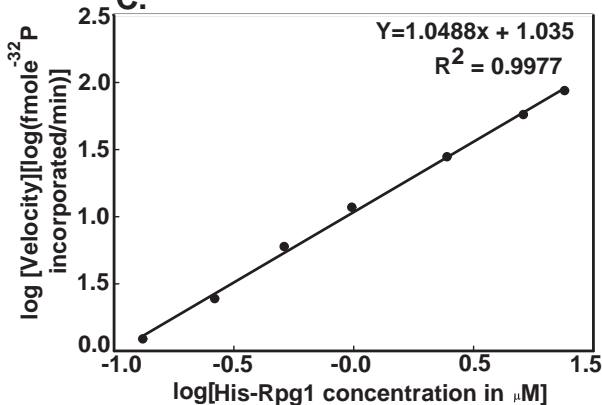

Supplement: pnas_0602379103_3.pdf [file pnas_0602379103_3.pdf]
